# Supplementary material for: High rate capability performance of ordered mesoporous TiNb6O17 microsphere anodes for lithium ion batteries
Source: Royal Society of Chemistry journal article supplement (doi:10.1039/c7dt03514d), 2017-01-01
Supplement: c7dt03514d1.pdf [file c7dt03514d1.pdf]

## Supporting Information

### **High rate capability performance of ordered mesoporous TiNb<sub>6</sub>O<sub>17</sub> microspheres anodes for lithium ion batteries**

Ruixue Sun <sup>a</sup>, Guangyin Liu <sup>a\*</sup>, Shuzhi Cao <sup>b</sup>, Bitao Dong <sup>c</sup>, Xiaodi Liu <sup>a\*</sup>, Min Hu <sup>a</sup>,  
Miao Liu <sup>a</sup>, Xinying Duan <sup>a</sup>, Yingying Jiao <sup>a</sup>

<sup>a</sup>College of Chemistry and Pharmaceutical Engineering, Nanyang Normal University,  
Nanyang 473061, China

<sup>b</sup>College of Continuing Education, Nanyang Normal University, Nanyang 473061,  
P.R. China

<sup>c</sup>State Key Laboratory for Mechanical Behavior of Materials and MOE Key  
Laboratory for Non-equilibrium; Synthesis and Modulation of Condensed Matter and  
Department of Applied Chemistry, School of Science, Xi'an Jiaotong University,  
Xi'an 710049, People's Republic of China

\* Corresponding author. Tel.: +86 377 63513540

E-mail address: liugy13@163.com (G. Liu); liuxiaodiny@126.com (X. Liu)

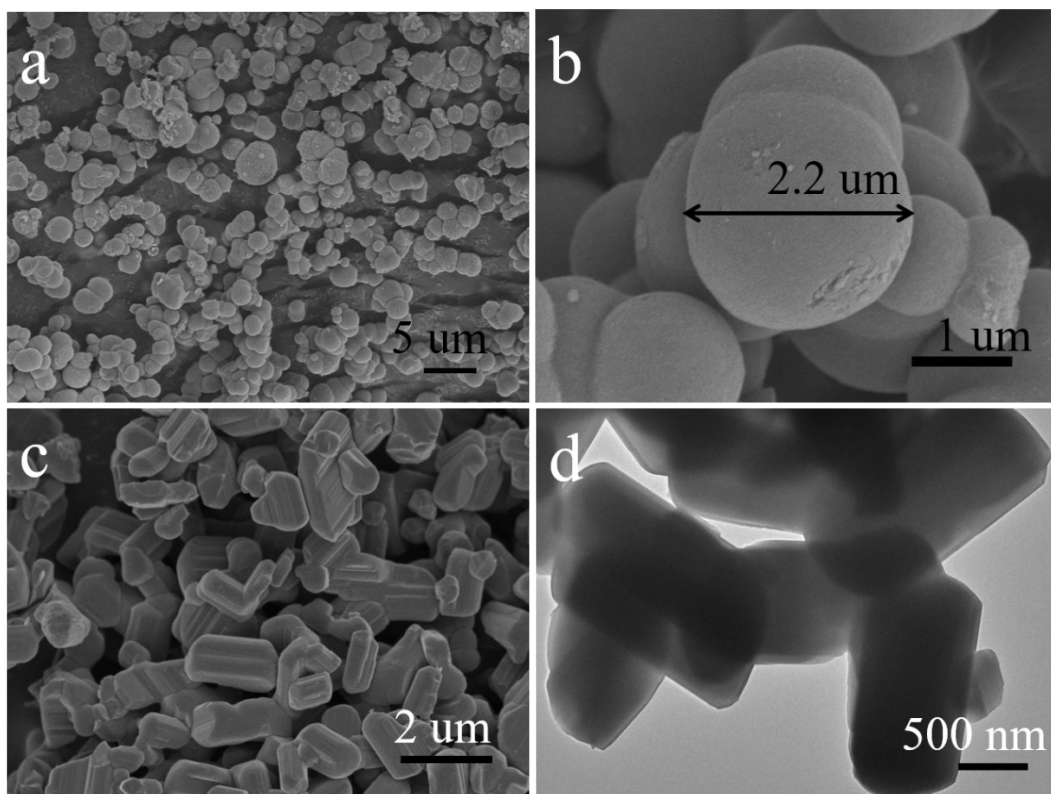

**Figure S1** (a, b) FESEM images of precursor M-TNO materials; (c) FESEM image of B-TNO materials; (d) TEM image of B-TNO materials.

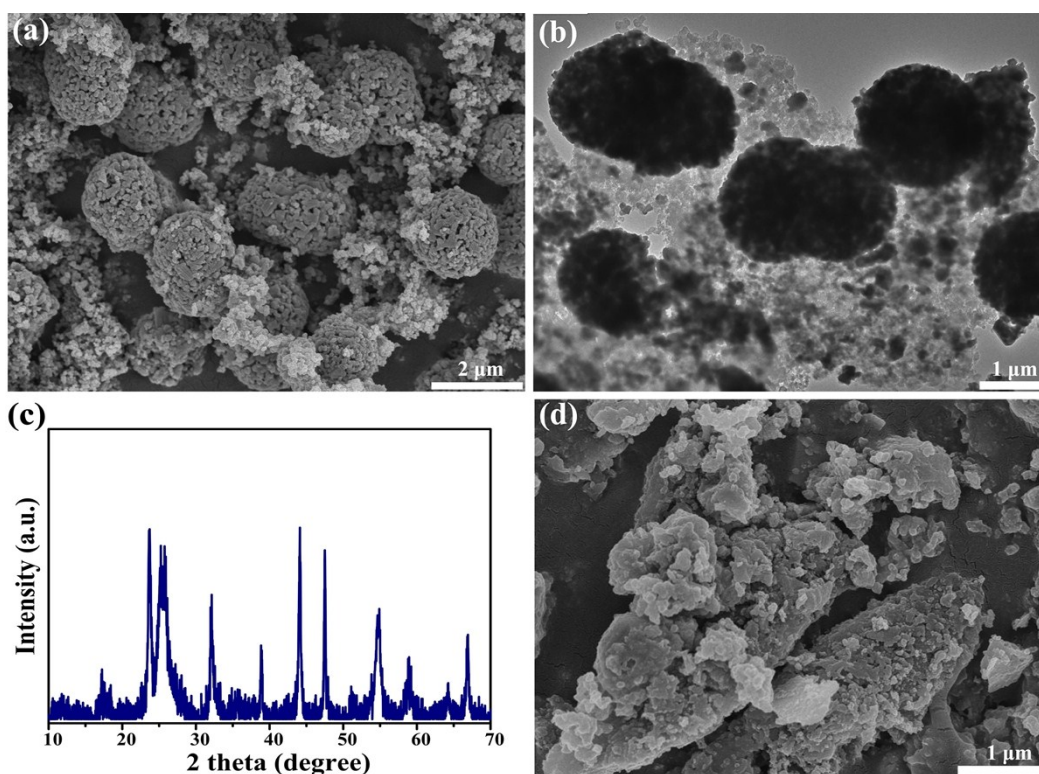

**Figure S2** (a) FESEM image, (b) TEM image, and (c) XRD pattern of mesoporous TiNb<sub>6</sub>O<sub>17</sub> after cycling for 500 cycles at 10 C; (d) FESEM image of bulk TiNb<sub>6</sub>O<sub>17</sub> after cycling for 500 cycles at 10 C.

**Table S1.** Electrochemical performance comparison of this work and previous reports of  $\text{TiNb}_6\text{O}_{17}$  anodes in Li-ion batteries.

| Sample                                  | Method                    | Performance                                  | Ref.                                     |
|-----------------------------------------|---------------------------|----------------------------------------------|------------------------------------------|
| Mesoporous $\text{TiNb}_6\text{O}_{17}$ | Solvothermal, calcination | 10 C, 500 cycles, 155.1 mA h g <sup>-1</sup> | <b><i>This work</i></b>                  |
| bulk $\text{TiNb}_6\text{O}_{17}$       | Solid-state method        | 5 C, 100 cycles, 171 mA h g <sup>-1</sup>    | <b><i>Chem. Commun.</i></b> <sup>1</sup> |
| $\text{TiNb}_6\text{O}_{17}/\text{C}$   | Solid-state method        | 10 C, 500 cycles, 165.1 mA h g <sup>-1</sup> | <b><i>Ceram. Int.</i></b> <sup>2</sup>   |

#### References

1. C. Lin, G. Wang, S. Lin, J. Li, L. Lu,  $\text{TiNb}_6\text{O}_{17}$ : a new electrode material for lithium-ion batteries, *Chem. Commun.*, 2015, **51**, 8970.
2. W. Mao, K. Bao, L. Wang, G. Liu, H. Xie, R. Zhang, S. Zheng, J. Guo, B. Li, W. Wang, Synthesis of  $\text{TiNb}_6\text{O}_{17}/\text{C}$  composite with enhanced rate capability for lithium ion batteries, *Ceram. Int.*, 2016, **42**, 16935.
